# Supplementary material for: Native and fermented waxy cassava starch as a novel gluten-free and clean label ingredient for baking and expanded product development
Source: Royal Society of Chemistry journal article supplement (doi:10.1039/d2fo00048b), 2022-01-01
Supplement: d2fo00048b1.pdf [file d2fo00048b1.pdf]

FIG. S1. Reliability of the breadmaking capacity protocol used in this study.

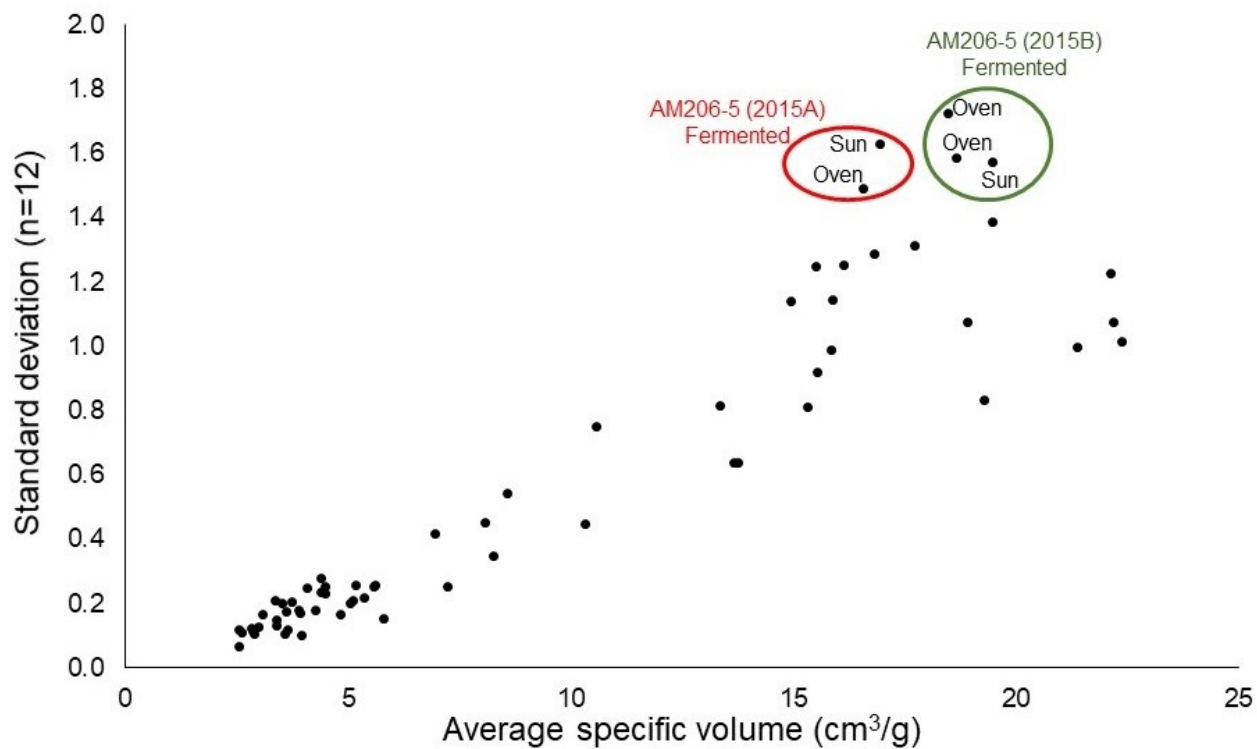

**Supplementary Figure S1.** Relationship between average specific volume (cm<sup>3</sup>/g) and standard deviation (n=12) for each starch sample evaluated (data from Experiments 1 and 2). Results from each combination of treatment (e.g. a particular starch sample) were based on two replications (e.g. two baking batches of 12 bread rings each). The average coefficient of variation was 5.4%, ranging from 2.6 to 9.6%.
